# Supplementary material for: Prevalence of Sleep Disorders, Risk Factors and Sleep Treatment Needs of Adolescents and Young Adult Childhood Cancer Patients in Follow-Up after Treatment
Source: MDPI journal article supplement (doi:10.3390/cancers14040926), 2022-02-13
Supplement: s1 [file s1]

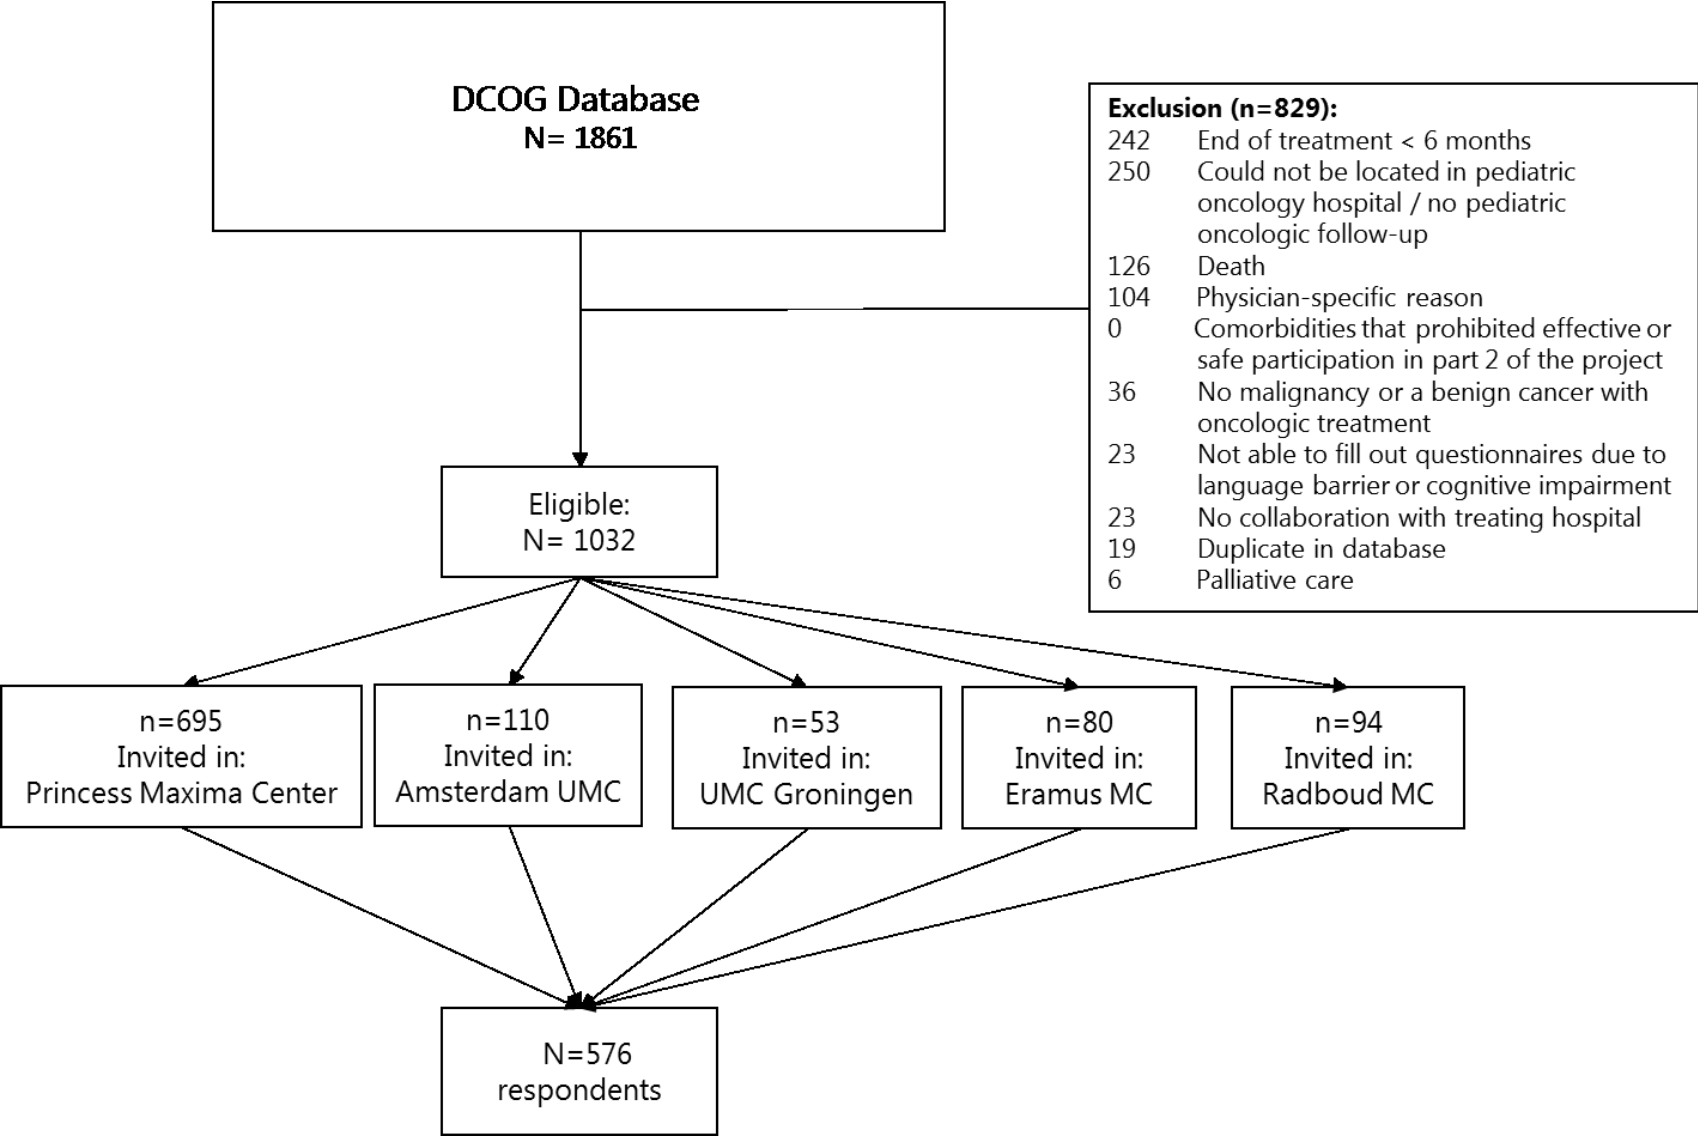

Figure S1. Flow chart of patient inclusion

Table S1. Sleep medication use per sleep disorder

| <b>n (%)</b>                            | <b>RLS-LMS<br/>(n=43)</b> | <b>SBD (n=10)</b> | <b>Parasomnia<br/>(n=20)</b> | <b>Hypersomnia<br/>(n=20)</b> | <b>CRSD (n=46)</b> | <b>Insomnia<br/>(n=54)</b> | <b>No sleep disorders<br/>(n=468)</b> |
|-----------------------------------------|---------------------------|-------------------|------------------------------|-------------------------------|--------------------|----------------------------|---------------------------------------|
| Use homeopathic remedies                | 4 (9.3)                   | 1 (10.0)          | 1 (5.0)                      | 1 (5.0)                       | 0 (0.0)            | 2 (3.7)                    | 2 (0.4)                               |
| Use benzodiazepine                      | 1 (2.3)                   | 0 (0.0)           | 0 (0.0)                      | 0 (0.0)                       | 0 (0.0)            | 0 (0.0)                    | 5 (1.1)                               |
| Use melatonin                           | 7 (16.3)                  | 3 (30.0)          | 5 (25.0)                     | 5 (25.0)                      | 8 (17.4)           | 11 (20.3)                  | 32 (6.8)                              |
| Used sleep medication in the past month | 13 (30.2)                 | 5 (50.0)          | 6 (30.0)                     | 6 (30.0)                      | 8 (17.4)           | 14 (25.9)                  | 38 (8.2)                              |

Note. Patients that use multiple medications count in multiple cells.

**Table S2.** Rates pre- and during the covid-19 pandemic.

|             | Total group (N=565)                      |                                             |                         | Adolescents (n=323)                      |                                             | Young adults (n=242)                     |                                            |
|-------------|------------------------------------------|---------------------------------------------|-------------------------|------------------------------------------|---------------------------------------------|------------------------------------------|--------------------------------------------|
|             | Pre-covid-19 pandemic,<br>n (%)<br>n=367 | During covid-19 pandemic,<br>n (%)<br>n=198 | OR (95%CI) <sup>1</sup> | Pre-covid-19 pandemic,<br>n (%)<br>n=198 | During covid-19 pandemic,<br>n (%)<br>n=125 | Pre-covid-19 pandemic,<br>n (%)<br>n=169 | During covid-19 pandemic,<br>n (%)<br>n=73 |
| Insomnia    | 44 (12.0)                                | 10 (5.1)                                    | 0.41 (.20-.83)*         | 18 (9.1)                                 | 6 (4.8)                                     | 26 (15.4)                                | 4 (5.5)                                    |
| CRSD        | 38 (10.4)                                | 8 (4.0)                                     | -                       | 12 (6.1)                                 | 6 (4.8)                                     | 26 (15.4)                                | 2 (2.7)                                    |
| RLS-LMS     | 34 (9.2)                                 | 9 (4.5)                                     | -                       | 13 (6.6)                                 | 8 (6.4)                                     | 21 (12.4)                                | 1 (1.4)                                    |
| Parasomnia  | 16 (4.4)                                 | 4 (2.0)                                     | -                       | 5 (2.5)                                  | 4 (3.2)                                     | 11 (6.5)                                 | 0 (0.0)                                    |
| Hypersomnia | 17 (4.6)                                 | 3 (1.5)                                     | -                       | 4 (2.0)                                  | 2 (1.6)                                     | 13 (7.7)                                 | 1 (1.4)                                    |
| SBD         | 8 (2.2)                                  | 2 (1.0)                                     | -                       | 2 (1.0)                                  | 1 (0.8)                                     | 6 (3.6)                                  | 1 (1.4)                                    |

Note. OR and 95% CI are presented, if significant asterisks were added \* <.05, \*\*<.01 \*\*\*<.001. 1. Analysis is adjusted for age. Only those with a sample ≥10 per event are tested.

*Post-hoc analyses: differences between pre versus post covid-19 pandemic recruitment*

Patients recruited pre the covid-19 pandemic (Nov-18 until Feb-20) showed higher prevalence rates of sleep disorders compared to those recruited during the covid-19 pandemic (March-20-July-21), see Supplement 3. Since samples were small, only insomnia rate could be statistically evaluated, which was significantly decreased during the covid-19 pandemic (OR 0.41, 95% CI .20-.83,  $p < .05$ ) controlled for age. When assessing sample differences, the sample recruited post-pandemic was younger (pre  $M = 17.2$   $SD = 2.84$  versus post  $M = 16.6$ ,  $SD = 2.98$ ) and contained less young adults (pre 46.0% versus post 36.9%, OR 0.70, 95%CI .50-1.00,  $p = .05$ ). Furthermore, there were no differences in sex, educational level and co-morbid health conditions ( $p > .05$ ).
